# Supplementary material for: Demographic Factors Predict Risk of Lymph Node Involvement in Patients with Endometrial Adenocarcinoma
Source: MDPI journal article supplement (doi:10.3390/biology12070982), 2023-07-10

Figure S1. Nomogram for predicting risk of only pelvic LN+ with tumor size in centimeters.

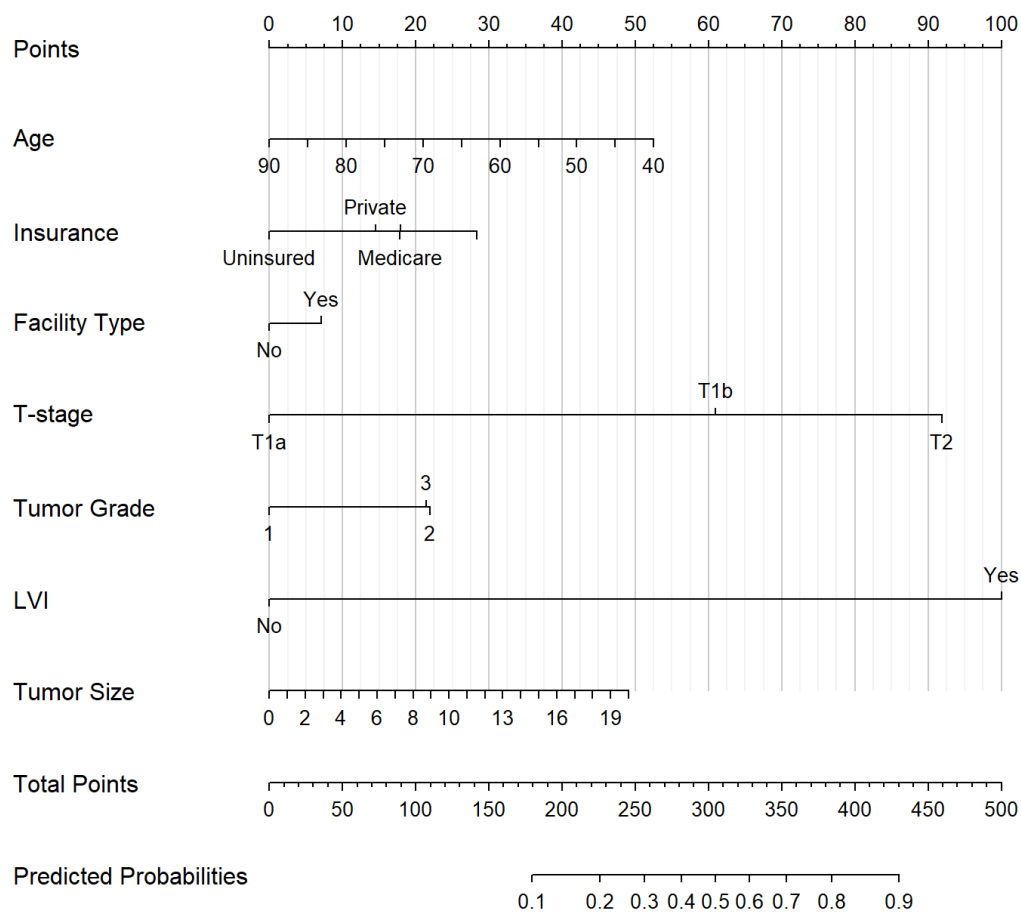

Figure S2. Nomogram for predicting risk of paraaortic +/- pelvic LN+ with tumor size in centimeters.

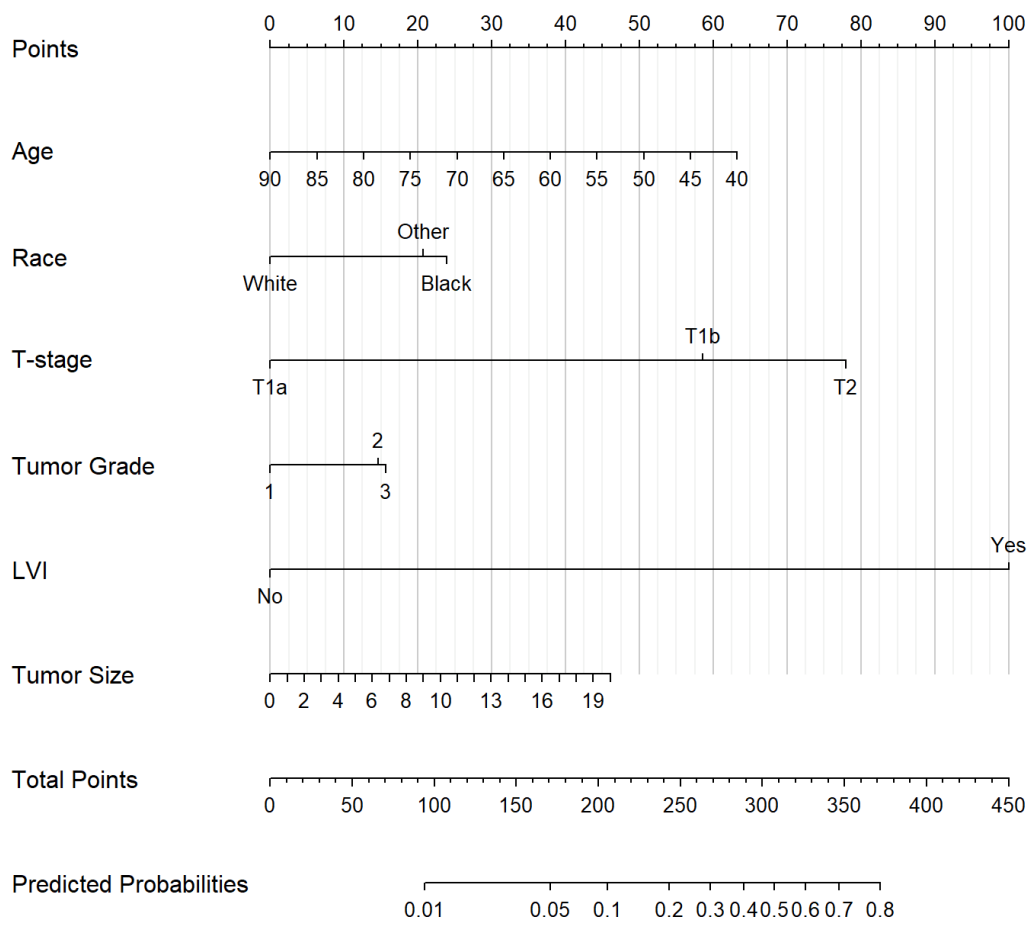

Supplement: s1 [file s1]
